1 **Title**

2 **Empathic contagious pain and consolation in laboratory rodents: species and sex**  
3 **differences**

4  
5 **Short title: Empathy for pain in laboratory rodents**

6  
7 **Authors**

8 Rui Du<sup>1\*</sup>, Wen-Jun Luo<sup>1\*</sup>, Kai-Wen Geng<sup>1\*</sup>, Chun-Li Li<sup>1,2</sup>, Yang Yu<sup>1,2</sup>, Na Wei<sup>1,2</sup>, Ting He<sup>1,2</sup>,  
9 Jun Chen<sup>1,2†</sup>

10  
11 **Affiliations**

12 <sup>1</sup>Institute for Biomedical Sciences of Pain, Tangdu Hospital, The Fourth Military Medical  
13 University, Xi'an P.R. China.

14 <sup>2</sup>Key Laboratory of Brain Stress and Behavior, People's Liberation Army, Xi'an, P.R. China.

15 \*These authors contributed equally to this work.

16 †Corresponding author. Email: [junchen@fmmu.edu.cn](mailto:junchen@fmmu.edu.cn) (J. Chen).

17  
18 **Abstract**

19 Laboratory rodents are gregarious in nature and have a feeling of empathy when witnessing a  
20 familiar conspecific in pain. The rodent observers express two levels of empathic responses:  
21 empathic contagious pain (ECP) and empathic consolation (EC). Here we examined the sex  
22 and species difference of ECP and EC in male and female mice and rats. We observed no  
23 species difference in both ECP and EC, but significant species difference in general prosocial  
24 (allo-mouth and/or allo-tail sniffing) and non-social (self-grooming) behaviors. For sex  
25 difference, male mouse observers showed more allo-licking and allo-grooming behaviors  
26 toward a familiar conspecific in pain during and longer time increase in pain sensitivity after the  
27 PDSI than female mouse observers. However, no sex difference was observed in rats. Our  
28 results highlighted an evolutionary view of empathy that social animals including rodents also  
29 have the ability to feel, recognize, understand and share the other's distressing states.

30  
31 **MAIN TEXT**

32  
33 **Introduction**

34 Increasing lines of evidence from both clinical and basic research implicate an important role of  
35 social communication in modulation of pain (1, 2, 3). In practice, coping skills among couples  
36 and family members have been demonstrated to relieve pain under chronic conditions, probably  
37 through decreasing social stress and increasing social buffering (4, 5). Recently, these findings  
38 raise some interesting questions and debates on the concept of pain. Some researchers indicated  
39 that pain should be redefined as a distressing experience associated with actual or potential  
40 tissue damage that involves not only sensory and emotional experience, but also cognitive and  
41 social components, highlighting the mediating roles of higher brain structures in social  
42 recognition and compassion of pain (6). However, so far less is known about the brain  
43 processing and neural mechanisms of one's social recognizing, understanding and sharing of

44 suffering in pain patients due to lack of theoretical framework, animal models and experimental  
45 tools in the field of pain research and management.

46 Empathy for pain is a concept referred to as an evolutionary behavior of social animals and  
47 humans associated with the ability to feel, recognize, understand and share the other's  
48 distressing (pain, social rejection and catastrophe) states through social communications and  
49 interactions (7, 8). Empathy for pain is a vicarious feeling that is felt through social transfer or  
50 contagion from a distressing object to a witnessing subject. This process has been demonstrated  
51 to be mediated by central neural network mainly consisting of the anterior cingulate cortex  
52 (ACC) and anterior insular cortex that also mediates direct emotional feeling of pain (physical  
53 pain) in humans (9, 10, 11). Psychologically, witnessing distressing condition of others can  
54 motivate sympathy of a subject toward unfamiliar people, but may deeply activate a subject's  
55 empathic concern, consolation and desire to help toward his/her familiar social members  
56 (family, kin, friends, colleagues, etc.) (8, 12, 13). Meanwhile, witnessing or learning of one's  
57 family member in pain or distress may also result in a strong feeling of pain in one's heart  
58 through empathic contagion of pain across individuals (7, 9). Social pain associated with social  
59 rejection, defeat and failure or loss of social connections may also activate the ACC and other  
60 brain structures (14), implicating an overlap of functional neural correlates that are associated  
61 with cognition, empathy for pain, social pain and physically emotional pain (15).

62 Do animals have a feeling of empathy? If yes, do animals share the same neural processing  
63 as humans do? This question is still on debate and requires to be answered by deep study and  
64 strong lines of experimental evidence. More recently, based upon the seed discovery of  
65 reciprocal enhancement of pain across dyadic mice both in pain through social interaction (16,  
66 17), we have developed a behavioral model of empathy for pain in rats (18, 19, 20).

67 Experimentally, the behaviors associated with empathy for pain in rats can be recognized as two  
68 types: one is referred to as an observer's empathic consolation that is driven by social interacting  
69 with a demonstrator in pain (18, 21), the other is referred to as empathic transfer of pain  
70 (contagious pain) from distressing object to witnessing subject (18, 19, 20). Briefly, the  
71 empathic consolation in rats has been identified as allo-licking and allo-grooming behaviors  
72 during 30-min priming dyadic social interaction (PDSI) between a naive cagemate observer  
73 (CO) and a familiar demonstrator (CD) in pain: (1) allo-licking can be defined as an observer's  
74 sustained licking action to a demonstrator's injury site; (2) allo-grooming can be defined as an  
75 observer's head contact with the head or body of a demonstrator in pain, accompanied by a  
76 rhythmic head movement (13, 18, for details see 22). The bouts of allo-licking and allo-  
77 grooming behaviors can be captured by video camera recorder (VCR) and off-line analyzed  
78 qualitatively and quantitatively (see 22 and Methods below). While, empathic contagious pain,  
79 also referred to as empathic pain hypersensitivity in our previous reports, has been identified  
80 qualitatively and quantitatively as lowered pain threshold or increased pain sensitivity in the CO  
81 rats after the PDSI with a CD in pain (18, 19, 20). The empathic pain hypersensitivity remains  
82 unchanged for at least 5 h in time course measured immediately after the PDSI (18, 20).  
83 Although allo-grooming behavior could be seen in both familiar and unfamiliar conspecifics  
84 during the PDSI, allo-licking behavior and empathic contagious pain could only be seen in  
85 familiar (CO) observer, suggesting that the establishment of familiarity among conspecifics is  
86 essential to induction of empathic responses to other's pain in rats (7).

87 To answer the common questions whether there are species and sex differences in the  
88 model of empathy for pain in laboratory rodents, we further designed and studied the behavioral  
89 parameters associated with empathic contagious pain and consolation in both male and female  
90 mice and rats.

## 91 Results

93 **2.1. Species and sex comparisons of empathic consolation behavior**

94 **2.1.1. Species comparisons of empathic consolation behavior**

95 Under the experimental paradigm as shown in [Fig. 1](#), there was no species difference in latency,  
96 total time and counts of allo-licking and allo-grooming between mice and rats in either male or  
97 female ([Table 1](#)). Species difference was not revealed in allo-tail sniffing in terms of latency  
98 and total time between mice and rats in either male or female ([Table 1](#)). Although male mice  
99 had more counts than male rats ( $p = 0.002$ , Mann-Whitney U test), species difference was not  
100 seen between mice and rats of female for the counts of allo-tail sniffing ([Table 1](#)). As for the  
101 non-social behavior, rats of both sexes spent more time in self-licking and self-grooming than  
102 mice of both sexes ([Table 1](#), mice vs. rats:  $p = 0.017$  for male and  $p = 0.016$  for female, Mann-  
103 Whitney U test) although counts showed no species difference. Moreover, rats of both sexes  
104 had shorter latency in self-grooming than mice of both sexes although statistical significance for  
105 species difference was only seen in male ([Table 1](#),  $p = 0.001$ , Mann-Whitney U test). It was  
106 surprisingly noted that although allo-mouth sniffing could be seen in mice ([Figs. 2C-D, Fig. 3C-](#)  
107 [D](#)), no such behavior could be observed in rats during 30-min PDSI.

108 Taking the data of latency and time course together ([Fig. 2](#)), it was revealed that both  
109 mouse and rat observers of either male or female were likely to approach to the CD in pain as  
110 quickly as possible and spent more time on empathic consolation and prosocial behaviors than  
111 self-grooming behavior.

112  
113 **2.1.2. Sex comparisons of empathic consolation behavior**

114 In mice, sex difference was distinctly seen in both empathic consolation and general prosocial  
115 behaviors in terms of time and counts but with latency being of no sex difference ([Fig. 2A-F,](#)  
116 [Fig.3A-F](#), see [Tables S1 and S2 for statistical analysis](#)). Male mice spent more time and had  
117 more counts than female in allo-licking/allo-grooming and allo-mouth/allo-tail sniffing toward a  
118 CD in pain during the early 20 min PDSI ([Fig.3A-F](#), see [Tables S1 and S2 for statistical](#)  
119 [analysis](#)), while there was no sex difference in self-licking/self-grooming in terms of latency,  
120 time and counts ([Fig.2G-H, Fig.3G-H](#), see [Tables S1 and S2 for statistical analysis](#)).

121 In rats, no sex difference was seen in either empathic consolation or general prosocial  
122 behavior in terms of latency, time and counts ([Fig.2I-L, Fig.3I-L](#), see [Tables S1 and S2 for](#)  
123 [statistical analysis](#)). Although female rats likely had relatively shorter latency than male ( $p =$   
124  $0.019$ , Mann-Whitney U test), no sex difference was seen in time and counts of self-grooming  
125 behavior ([Fig.2M-N, Fig.3M-N](#), see [Tables S1 and S2 for statistical analysis](#)).

126  
127 **2.2. Species and sex comparisons of empathic contagious pain**

128 Similar to our previous reports on rats ([18, 19, 20, 22](#), also see [Fig.5B-C here](#)), empathic  
129 contagion of pain occurred as well in naive mouse observer after 30-min PDSI. Both male and  
130 female observer mice presented long-term mechanical pain hypersensitivity after 30-min PDSI  
131 with a CD in pain, being evidenced by significant leftward shift of stimulus-response functional  
132 curves from the baseline ([Fig.4A-F](#), see [Tables S1, S2 and S3 for statistical analysis](#)). The  
133 empathic contagion of pain from a CD in pain to a naive CO did not disappear until 240 min in  
134 female and 300 min in male after PDSI in mice ([Fig.4 and Fig.5A](#), see [Tables S1, S2 and S3 for](#)  
135 [statistical analysis](#)).

136  
137 **2.2.1 Species comparisons of empathic contagious pain**

138 Generally speaking, no species difference in empathic contagious pain was found between mice  
139 and rats of either sex in terms of magnitude and time course under the same experimental  
140 condition, procedure and paradigm ([Figs.4-5](#), see [Tables S1, S2 and S3 for statistical analysis](#)).

141

### 2.2.2. Sex comparisons of empathic contagious pain

No sex difference was found in empathic contagious pain between male and female observers in either mice or rats in terms of magnitude and time course under the same experimental condition, procedure and paradigm between 0-180 min period after PDSI (Fig.4 and Fig.5A, see Tables S1, S2 and S3 for statistical analysis). However, the empathic mechanical pain hypersensitivity in mouse observer was maintained relatively longer for about 60 min in male than in female (Fig.4 and Fig.5A, see Tables S1, S2 and S3 for statistical analysis). No sex difference was found in empathic contagious pain between male and female observers in rats during the whole time of observation (Fig.5B-C, see Tables S1 and S2 for statistical analysis).

## Discussion

### 3.1. Evidence for evolutionary issue of empathy

From the evolutionary point of view, empathy has been proposed to be hierarchical in mammals that has evolved from very low stage (motor mimicry and emotional contagion) to relatively higher stage (empathic concern and consolation), and finally to the highest stage (perspective-taking, mentalizing, theory of mind and targeted-help) from lower animals to human beings (8). Although several emerging lines of evidence support existence of emotional contagion in lower mammals (3, 7, 23, 24, 25), answers to the questions about whether lower mammals are able to recognize, understand, share and care others are still controversial due to lack of enough direct experimentally supporting evidence (13, 18, 26). In a series of reports on the empathy for pain in rats and mice of the present study, our lab has provided with strong lines of experimental evidence supporting existence of both emotional contagion and empathic consolation in laboratory rodents (7, 18, 19, 20, 22). Before the coming of our findings, empathic consolation has only been observed in a special sub-species of wild rodents - socially monogamous, biparental prairie vole (13) although emotional contagious pain or observational fear learning have been increasingly evidenced (3, 7, 8). Taken together, it has been demonstrated experimentally that lower mammals such as rodents may have both lower stage (emotional contagion) and relatively higher stage (empathic concern and consolation) of empathy, supporting the rationality of theoretical Russian-doll model for the evolution of empathy in mammals (8). Moreover, the findings that social familiarity plays essential roles in induction of empathy for pain in rodents also support Darwin's assertion that "with all animals, sympathy is directed solely towards the members of the same community, and therefore towards known, and more or less beloved members, but not to all the individuals of the same species" (7, 12).

### 3.2. Qualitative and quantitative assessment of empathy for pain in laboratory rodents

In the past century, study of empathy has been mostly performed in non-human primates and other non-laboratory animals outdoors (8, 23, 24, 25). This has greatly limited the number of researchers joining the study and hindered the advances of empathy research in terms of biopsychosocial-brain-behavioral paradigm (7, 23, 24, 25). Therefore, discovering, developing and validating the laboratory animal models of empathy would be very important and critical for opening a new field of science - neuroscience of empathy. Here we have developed a state-of-the-art laboratory rodent model of empathy for pain in both mice and rats using a set of novel behavioral parameters for both qualitative and quantitative assessment. We have identified and validated two behavioral identities from laboratory rodent model of empathy for pain: (1) empathic consolation; (2) empathic contagious pain.

#### 3.2.1. Are there species and sex differences in empathic consolation between mice and rats?

To make qualitative and quantitative assessment of empathic consolation, we successfully identified allo-licking and allo-grooming behaviors from the naive observer during PDSI with a

191 CD in pain. To see whether the observer's allo-licking and allo-grooming behaviors are  
192 selective or specific to the injury and pain of the object (CD), we also evaluated general  
193 prosocial behavior (allo-mouth and/or allo-tail sniffing) and non-social behavior (self-licking  
194 and self-grooming) in the observer (CO). In each type of targeted behaviors, four bio-  
195 parameters including latency, time course, total time and visit counts were quantitatively  
196 assessed. In the present study, it was clearly shown that there was no species difference between  
197 mice and rats for empathic allo-licking and allo-grooming behaviors in either male or female  
198 (Table 1), suggesting laboratory rodents can be motivated to perform empathic consolation  
199 when witnessing their familiars in painful or distressing condition. Mice and rats are likely  
200 sharing and caring as humans. Bio-parameter data showed that both mouse and rat observers  
201 began to approach toward the CD in pain in a short delay while witnessing and then spent  
202 longer time to lick the injury site and to groom the body of the injured partners. As contrast, the  
203 same animals had longer latency and less count in either self-licking/self-grooming or allo-tail  
204 and allo-mouth sniffing, suggesting that laboratory rodents have a strong ability to rapidly  
205 recognize and understand the distressing condition of others. And this process is likely to  
206 motivate visiting, sharing and caring of the injured object at the expense of loss of their time in  
207 exploring and self-grooming. Because self-grooming is predominant in rodents' usual behaviors  
208 (more than 40% of living time) (27, 28), loss of self-grooming and gain of allo-licking and allo-  
209 grooming in time during PDSI highly implicate existence of prosocial and altruistic behaviors in  
210 observer rodents while witnessing a familiar in pain.

211 It is interesting to note that there was a sex difference in visit counts and total time of allo-  
212 licking and allo-grooming as well as allo-mouth and allo-tail sniffing between male and female  
213 mice, however, no such sex difference was seen in rats. Unlike the results from humans and  
214 rodents that female are more empathic than male (29, 30, 31), in the current study, however, the  
215 male was likely to spend more time (three folds) than the female in mice to allo-lick and allo-  
216 groom the injured partner. Although the female observer mice had less time in allo-grooming  
217 but spent more time on allo-licking toward the BV-induced injury site in the CD object, the sex  
218 difference in empathic consolation in mice is not likely to be only caused by the sex difference  
219 in allo-grooming since general prosocial behaviors (allo-mouth and allo-tail sniffing) also had  
220 sex difference. Generally, the male has more consolation and more prosocial behaviors than the  
221 female in mice. Moreover, rats had equivalent amount of time and visit chance in allo-licking,  
222 allo-grooming and allo-tail sniffing between male and female. Although the underlying  
223 mechanisms of sex difference in the degree of empathic consolation and general prosocial  
224 behaviors in mice are not clear, the level of sex hormones, genetic background and other  
225 unknown factors should be considered. In mice, variability in empathic fear response has  
226 already been noted across different inbred strains (32, 33).

227

### 228 **3.2.2. Are there species and sex differences in empathic contagious pain between mice and** 229 **rats?**

230 As aforementioned, although mice and rats have different mechanical sensitivity to vF stimuli,  
231 standardized measurements revealed no species and sex differences in empathic contagious pain.  
232 Similar to our previous reports on male rats (18, 20), the current data further showed that the rat  
233 observers had no sex difference in empathic mechanical pain hypersensitivity between male and  
234 female after PDSI with a CD in pain (Fig.5B-C). The paw withdrawal mechanical threshold  
235 (PWMT) of both sexes became lowered by more than 50% immediately after the PDSI, and the  
236 lowered PWMT was maintained unchanged until 300 min of observation. The relative long-  
237 term decrease in PWMT could be identified in both sides of hind paws and was paralleled  
238 between male and female in rat observers. Similarly, empathic mechanical pain hypersensitivity  
239 was also identified in the mouse observers of both sexes immediately after the PDSI by showing

240 leftward shift of the stimulus-response functional curves from the baseline (Fig.4). The leftward  
241 shift of the stimulus-response functional curves remained unchanged between male and female  
242 mice until 240 min after the PDSI. Although the functional curve in male mouse observers still  
243 remained leftward shifted, that in female mouse observers recovered to overlap with the  
244 baseline since 240 min after the PDSI, suggesting that the male is likely to have longer time  
245 course of empathic contagious pain than the female in mice. The mouse fitted vF intensity for  
246 the half maximal response that is equivalent to the PWMT in rats also showed a separation of  
247 time effect between male and female at 240 min after the PDSI. Although sex- and gender-  
248 difference in pain have been well established (34), the sex-difference in empathic contagious  
249 pain in mice is not likely to be attributed to the sex-difference in mechanical pain sensitivity  
250 because the baseline stimulus-response functional curves overlapped very well between male  
251 and female. Whether this sex-associated separation in time effect of empathic contagious pain in  
252 mice has some relationship with sex-difference in empathic consolation is unknown and  
253 requires to be further elucidated.

254

### 255 **3.3. Laboratory rodent model of empathy for pain and its advantages in application**

256 Empathy has been believed to be fundamental to prosocial, altruistic and moral behaviors in  
257 human beings (8,35). Impairment of empathy can definitely lead to deficits in social  
258 communication and sociability (attachment, bonding, prosocial reciprocity, altruism and  
259 morality) that may be fundamental to some psychiatric disorders such as autism spectrum  
260 disorder (ASD), psychopathy, misconduct, antisocial personality disorder and schizophrenia (7).  
261 Thus, development and validation of laboratory rodent model of empathy are of great  
262 significance in further understanding of the biological basis of empathy and its evolution.  
263 Moreover, the use of the empathy for pain model may also shed new light on the underlying  
264 mechanisms of deficits in social communication and sociability in the ASD and other  
265 psychiatric disorders.

266 Based upon the present results from species and sex studies, male rats and mice are highly  
267 recommended to be used as observer subjects for study of empathy for pain in laboratory  
268 rodents due to less empathic consolation (allo-licking/allo-grooming) identified in female mice.  
269 Because female are more sensitive to pain stimuli and more susceptible to chronic pain  
270 conditions than male in both human and animal subjects due to biopsychosocial variables (34),  
271 pain mechanisms in female are also more complex than male. Moreover, familiar conspecifics  
272 of the same sex for PDSI are also recommended because sexual behaviors could not be  
273 completely excluded if heterosexual cagemates were allowed.

274 As introduced in our previous reports (18), the selection of pain models for preparing a  
275 demonstrator in pain is also important and critical. The more visually distinctly visible the pain-  
276 related behaviors are displayed by the CD, the more empathic responses could be induced in the  
277 rat observers in terms of both empathic contagious pain and consolation (18). Namely, rat  
278 observers showed more consolation (allo-licking and allo-grooming) behaviors during PDSI  
279 with a CD treated with BV than with CFA (18). Meanwhile, rat observers have distinct  
280 empathic contagious pain after PDSI with a CD treated with BV and formalin but do not have  
281 empathic contagious pain after the same period of PDSI with a CD prepared with CFA and  
282 spared nerve injury (18). These results suggest important roles of visual information in the  
283 induction and maintenance of empathic contagious pain and consolation as suggested by a  
284 previous report (16). Moreover, blockade of the pain in the CD with lidocaine at the injury site  
285 can relieve empathic contagious pain in the observer, suggesting that the social transfer of pain  
286 is pain-selective and specific (18).

287 In summary, laboratory rodents are gregarious in nature and have a feeling of empathy  
288 when witnessing a familiar conspecific in pain. The advantages of the use of laboratory rodent

289 (rats and mice) model of empathy for pain are as follows: (1) laboratory rodents are fed in a SPF  
290 animal facility and tested in a standardized experimental environment that are safe in prevention  
291 of infectious disease transmission from animal to animal and from animal to experimenters; (2)  
292 biological control makes genetic background of laboratory rodents more clear and comparable  
293 than wild animals such as prairie vole; (3) attracting and recruiting more biologists and  
294 neuroscientists who are interested in biological basis of empathy to join the research; (4) unlike  
295 the "double pain paradigm" introduced by Mogil's lab (16), the laboratory rodent observer are  
296 under naive condition prior to and during PDSI that can completely exclude the distressing  
297 effects of tonic pain stimulation on observer itself and make neurobiological, endocrine and  
298 other biological assays possible in further tests; (5) the laboratory rodent model of empathy for  
299 pain has been validated to have both empathic consolation and empathic contagious pain that  
300 are useful paradigms for studying evolutionary issues of empathy in mammals (7, 8); (6) our  
301 laboratory rodent model of empathy for pain has been approved to be mediated by top-down  
302 facilitation from the medial prefrontal cortex and the locus coeruleus -norepinephrine system  
303 (19, 20) that are known to be also important brain structures involved in empathy for pain in  
304 humans (9, 36); (7) our laboratory rodent model of empathy for pain will provide a novel bio-  
305 psychosocial-brain-behavioral paradigm that can be used in combination with other advanced  
306 techniques in neuroscience such as optogenetic, chemogenetic, *in-vivo* multi-electrode array  
307 recordings and other neuroimaging approaches in consciously socially interacting animals.  
308

## 309 **Materials and Methods**

### 310 **Animals**

311 Male and female C57BL/6 mice and Sprague-Dawley albino rats, purchased from the  
312 Laboratory Animal Center of the Fourth Military Medical University (FMMU), were used in  
313 this study. Both mice and rats with age of postnatal week 4-5 were translocated from the  
314 FMMU to Tangdu Hospital SPF animal facility in which 4-6 animals of the same species and  
315 the same sex were co-housed in each cage for another 2-3 weeks so as to familiarize with each  
316 other as cagemates (Fig.1). The newly regrouped animals were fed under standard conditions  
317 with a light-dark cycle (08:00-20:00) and adjustable room temperature ( $25\pm 2$  °C) and air  
318 humidity (55-65%). Both water and food pellets were available *ad libitum*. This study was fully  
319 in accordance with the recommendations of the ARRIVE guidelines (37), the U.K. Animals  
320 (Scientific Procedures) Act 1986 and associated guidelines, the EU Directive 2010/63/EU for  
321 animal experiments, the National Institutes of Health guide for the care and use of laboratory  
322 animals (NIH Publications No. 8023, revised 1978), and the ethical guidelines for investigations  
323 of experimental pain in conscious animals of the International Association for the Study of Pain  
324 were also critically followed (38). The number and suffering of animals were greatly minimized  
325 as required.  
326

### 327 **Experimental design and procedures**

328 Because, as aforementioned in the Introduction, the behaviors associated with empathy for pain  
329 in rodents can be experimentally classified into two types: an observer's empathic consolation  
330 that is driven by a demonstrator in pain during the PDSI (18, 21) and the empathic contagious  
331 pain identified immediately after PDSI (18, 19, 20, 22). The behavioral assays were carried out  
332 in a timeline as shown in Fig.1 (for details see our published protocol 22).  
333

### 334 **Establishment of familiarity**

335 After arrival at the hospital SPF animal facility, 4 mice or 4-6 rats of the same sex were  
336 regrouped and co-housed in each cage for more than 2 weeks (Fig.1, for protocol details see 22).  
337 To avoid social conflicts among adult animals, the time for regrouping should be 3-4 weeks

338 after birth and the number of animals to be co-housed should be limited to less than four for  
339 mice (more aggressive when stranger adults meet) and four to six for rats (less aggressive when  
340 stranger adults meet).

341

342

### **Habituation to experimental procedures**

343

344

345

346

347

348

The subjects to serve as an observer should be trained by acclimatizing to hand handling, experimental environment and VCR equipment once daily at least for three days before formal procedures for testing (Fig.1, for protocol details see 22). Hand handling was a very important procedure in this study because it could buffer social stress that may block empathy for pain (17, 18, 20).

349

### **Preparation of a demonstrator in pain**

350

351

352

353

354

355

356

357

358

359

360

361

362

363

364

365

366

367

The selection of pain models for preparing a demonstrator in pain is another critical step for induction of empathy for pain in a witnessing observer during and after the PDSI (18, 22). As demonstrated by our pioneering work (18), the induction of empathy for pain in an observer rat would be determined by the observability or visibility of spontaneous pain-related behaviors displayed or expressed by a familiar demonstrator in pain. Among the animal models of pain tested, the bee venom (BV) test, the formalin test and the acetic acid test that can induce long-term robust spontaneous pain-related behaviors such as paw flinching, paw licking and lifting or abdominal writhing have been demonstrated to be effective to induce both empathic consolation and empathic contagious pain, whereas, the complete Freund's adjuvant (CFA) and the spared nerve injury (SNI) models that induce less spontaneous pain-related behaviors are not effective in this paradigm (18, 21). Since the BV test is both a scientifically well-established and human-rodent co-experienced type of pain (39, 40, 41, 42), it was used in the whole experiment of this study. Briefly, the cagemate demonstrator (CD) received a subcutaneous (s.c.) injection of BV solution (25  $\mu$ l for mice and 50  $\mu$ l for rats, 0.4% lyophilized whole venom of *Apis mellifera* dissolved in physiological saline) into the left hind paw just before the start of the VCR recording of the PDSI and then re-united with the naive observer in the testing box (for details see 22).

368

### **Quantitative sensory test with von Frey filaments**

369

370

371

372

373

374

375

376

377

378

379

380

381

382

383

384

385

386

The mechanical pain sensitivity test setting includes a supporting platform and a nontransparent plastic testing box (10.5 cm x 10.5 cm x 15.8 cm) that is necessary to prevent any visual information from coming during testing. The supporting platform (160 x 30 x 40 cm) is equipped with metal mesh. The pore size of the mesh (0.5 cm x 0.5 cm) is preferably such that both mice and rats can move freely on the surface without getting caught. Because the mechanical pain sensitivity for paw withdrawal reflex was quite different between mice and rats, different quantitative method was used in this study. For both mice and rats, the mechanical pain sensitivity of the observer was measured prior to (1 day before for baseline) and after the PDSI (immediate, 30, 60, 120, 180, 240, 300 min). For mice who are likely to have high mechanical pain sensitivity and more active in locomotion in nature, an ascending series of calibrated von Frey (vF) filaments with intensities ranging from 0.16 to 1.40 g (1.60 to 13.72 mN) were used to induce paw withdrawal reflex from minimum (0) to maximum (100%). With the increasing intensity, each stimulus should be continued 1-2 seconds for 5 repetitions in 5 seconds apart, avoiding the same site. A sharp paw withdrawal or lift-up after a stimulus was considered a positive response and should be recorded. The averaged percent response (%) of a mouse to 5 stimuli of each intensity was calculated and the pooled stimulus-response functional curves were plotted. Comparing to the baseline, leftward shift of the stimulus-response functional curve was defined as hypersensitivity (hyperalgesia or allodynia), while rightward



387 shift of the curve was defined as hyposensitivity (analgesia) (43). Finally, the fitted vF intensity  
388 of half maximal response was obtained by Bliss method (44), serving as relative mechanical  
389 threshold for mice. For rats who have relatively low mechanical pain sensitivity and inactive in  
390 locomotion in nature, a series of calibrated vF filaments with bending force intensities ranging  
391 from 2.00 to 60.00 g (19.60 to 588.00 mN) were used to induce paw withdrawal reflex. The  
392 paw withdrawal mechanical threshold (PWMT), namely the bending force of a vF filament that  
393 enabled 50-60% response to 10 stimuli, was calculated. For details see our published protocol  
394 (22).

### 395 **PDSI and VCR recording**

396 Priming dyadic social interaction (PDSI) has been defined as a preemptive condition that allows  
397 full body contact, social communication and interaction between a naive observer and a  
398 demonstrator in pain for 30-min (7). A naive observer meant that the subject animal had no  
399 experience of pathologically tissue or nerve injury at all but only had experienced  
400 physiologically stroking stimulus by vF filaments one day before the PDSI (7). Briefly, a VCR  
401 (Sony, FDR-AX40, Japan) setting was arranged in a right top-down vertical view over the  
402 testing box (19 x 19 x 30 cm for mice and 40 x 30 x 15 cm for rats) which was used as an arena  
403 for 30-min PDSI (for details see 22).

### 404 **Offline qualitative identification and quantitative analyses of social and non-social 405 behaviors during PDSI**

406 According to repeated observations of the VCR-based behaviors in a 30-min lapse of time, the  
407 behaviors were classified into three types: (1) empathic consolation behavior identified as allo-  
408 licking and allo-grooming that has been described earlier in our lab (18, 22, also see  
409 Introduction); (2) general prosocial behaviors identified as allo-mouth sniffing and allo-tail  
410 sniffing (23, 35); (3) non-social behavior identified as self-licking and self-grooming that is an  
411 innate stereotyped and patterned behavior of rodents and other terrestrial mammals generated  
412 and controlled by the brain (27, 28). For each type of behaviors, the latency for the observer  
413 subject to first perform a type of behaviors after initiation of the PDSI, the time course and total  
414 time the observer subject spent on a type of behaviors during 30-min period of PDSI, and the  
415 total counts the observer subject behaved for each type of behaviors during 30-min period of  
416 PDSI were quantitatively rated and statistically analyzed. Both social and non-social behaviors  
417 were captured by the VCR in real time, and qualitatively identified and quantitatively analyzed  
418 offline by one to two analyzers who were blind to the treatment of animals. Grooming of less  
419 than 1 s was excluded. Grooming directed toward the genitals was excluded in this study.

### 420 **Statistical analysis**

421 All data were presented as mean  $\pm$  SEM. SPSS 25.0 was used for data analysis. In principle,  
422 parametric statistical analysis methods would be used if both normality test and equal variance  
423 test for samples passed, however, only non-parametric statistical analysis method would be used  
424 if either of the normality test or equal variance test failed (Table S1). Normality of the  
425 distribution was analyzed by Shapiro-Wilk test, while homogeneity of variance was analyzed by  
426 Levene test. Nonparametric two-tailed Mann-Whitney U test or parametric two-tailed *t*-test  
427 were used depending upon the results of the normality and homogeneity tests. Two-way  
428 ANOVA repeated measure (RM) with Bonferroni post hoc correction was used for time course  
429 data (Tables S2-S3). For within-time two-way ANOVA RM, Greenhouse-Geisser method was  
430 used if Mauchly's test of sphericity failed. For paired comparison, Wilcoxon Signed Rank Test,  
431 Friedman's *M* test and Mann-Whitney *U* test (two-tailed) were used if Shapiro-Wilk test and  
432 Equal variance test failed (Tables S2-S3). Sample size was predicted with one-way ANOVA  
433  
434  
435

436 Power Analysis (Table S4).  $P < 0.05$  was considered as statistically significant. Graphs and  
437 plots in the illustrations were made by GraphPad Prism version 7.0a.

438

### 439 **Supplementary Materials**

440 Table S1. Detailed descriptions of the number of animals used and statistical analyses for each  
441 part of the experiments.

442 Table S2. Time effects of empathic consoling and empathic contagion of pain in mice and rats  
443 of both sexes.

444 Table S3. Sex comparisons of stimulus-response functional curves in mice.

445 Table S4. Sample size prediction by one-way ANOVA Power Analysis.

446

### 447 **References and Notes**

- 448 1. Craig KD. Social communication model of pain. *Pain*. **156**, 1198-1199 (2015).
- 449 2. Hadjistavropoulos T, Craig KD, Duck S, Cano A, Goubert L, Jackson PL, Mogil JS, Rainville P,  
450 Sullivan MJL, Williams ACC, Vervoort T, Fitzgerald TD. A biopsychosocial formulation of  
451 pain communication. *Psychol Bull*. **137**, 910-939 (2011).
- 452 3. Mogil JS. Social modulation of and by pain in humans and rodents. *Pain*. **156 Suppl 1**, S35-41  
453 (2015).
- 454 4. Jensen MP, Turner JA, Romano JM, Strom SE. The Chronic Pain Coping Inventory:  
455 development and preliminary validation. *Pain*. **60**, 203-216 (1995).
- 456 5. Rosenstiel AK, Keefe FJ. The use of coping strategies in chronic low back pain patients:  
457 relationship to patient characteristics and current adjustment. *Pain*. **17**, 33-44 (1983).
- 458 6. Williams AC, Craig KD. Updating the definition of pain. *Pain*. **157**, 2420-2423 (2016).
- 459 7. Chen J. Empathy for distress in humans and rodents. *Neurosci Bull*. **34**, 216-236 (2018).
- 460 8. de Waal FBM, Preston SD. Mammalian empathy: behavioural manifestations and neural basis.  
461 *Nat Rev Neurosci*. **18**, 498-509 (2017).
- 462 9. Singer T, Seymour B, O'Doherty J, Kaube H, Dolan RJ, Frith CD. Empathy for pain involves  
463 the affective but not sensory components of pain. *Science*. **303**, 1157-1162 (2004).
- 464 10. Lamm C, Decety J, Singer T. Meta-analytic evidence for common and distinct neural networks  
465 associated with directly experienced pain and empathy for pain. *Neuroimage*. **54**, 2492-502  
466 (2011).
- 467 11. Zaki J, Wager TD, Singer T, Keysers C, Gazzola V. The Anatomy of suffering: Understanding  
468 the relationship between nociceptive and empathic Pain. *Trends Cogn Sci*. **20**, 249-259 (2016).
- 469 12. Darwin C. *The descent of man* (London: Penguin Group, 1871). [second edition].
- 470 13. Burkett JP, Andari E, Johnson ZV, Curry DC, de Waal FB, Young LJ. Oxytocin-dependent  
471 consolation behavior in rodents. *Science*. **351**, 375-378 (2016).
- 472 14. Eisenberger NI. Social pain and the brain: controversies, questions, and where to go from here.  
473 *Annu Rev Psychol*. **66**, 601-29 (2015).
- 474 15. Iannetti GD, Salomons TV, Moayed M, Mouraux A, Davis KD. Beyond metaphor: contrasting  
475 mechanisms of social and physical pain. *Trends Cogn Sci*. **17**, 371-378 (2013).
- 476 16. Langford DJ, Crager SE, Shehzad Z, Smith SB, Sotocinal SG, Levenstadt JS, Chanda ML,  
477 Levitin DJ, Mogil JS. Social modulation of pain as evidence for empathy in mice. *Science*. **312**,  
478 1967-1970 (2006).
- 479 17. Martin LJ, Hathaway G, Isbester K, Mirali S, Acland EL, Niederstrasser N, Slepian PM, Trost  
480 Z, Bartz JA, Sapolsky RM, Sternberg WF, Levitin DJ, Mogil JS. Reducing social stress elicits  
481 emotional contagion of pain in mouse and human strangers. *Curr Biol*. **25**, 326-332 (2015).
- 482 18. Li CL, Yu Y, He T, Wang RR, Geng KW, Du R, Luo WJ, Wei N, Wang XL, Wang Y, Yang Y,  
483 Yu YQ, Chen J. Validating rat model of empathy for pain: effects of pain expressions in social  
484 partners. *Front Behav Neurosci*. **12**, 242 (2018).

- 485 19. Li Z, Lu YF, Li CL, Wang Y, Sun W, He T, Chen XF, Wang XL, Chen J. Social interaction  
486 with a cagemate in pain facilitates subsequent spinal nociception via activation of the medial  
487 prefrontal cortex in rats. *Pain*. **155**, 1253-1261 (2014).
- 488 20. Lü YF, Yang Y, Li C-L, Wang Y, Li Z, Chen J. The locus coeruleus–norepinephrine system  
489 mediates empathy for pain through selective up-regulation of P2X3 receptor in dorsal root  
490 ganglia in rats. *Front Neural Circuits*. **11**, 66 (2017).
- 491 21. Lü YF, Ren B, Ling BF, Zhang J, Xu C, Li Z. Social interaction with a cagemate in pain  
492 increases allogrooming and induces pain hypersensitivity in the observer rats. *Neurosci Lett*.  
493 **662**, 385-388 (2018).
- 494 22. Yu Y, Li C-L, Du R, Chen J. Rat model of empathy for pain. *Bio-protocol*. **9**, e3266 (2019).
- 495 23. Panksepp J. *Affective neuroscience: The foundations of human and animal emotions* (Oxford  
496 University Press, 1998).
- 497 24. Panksepp JB, Lahvis GP. Rodent empathy and affective neuroscience. *Neurosci Biobehav Rev*.  
498 **35**, 1864-1875 (2011).
- 499 25. Panksepp J, Panksepp JB. Toward a cross-species understanding of empathy. *Trend Neurosci*.  
500 **36**, 489-496 (2013).
- 501 26. Langford DJ, de C Williams AC. The caring, sharing rat? *Pain*. **155**, 1183-1184 (2014).
- 502 27. Kalueff AV, LaPorte JL, Bergner CL. *Neurobiology of grooming behavior* (Cambridge:  
503 Cambridge University Press, 2010).
- 504 28. Kalueff AV, Stewart AM, Song C, Berridge KC, Graybiel AM, Fentress JC. Neurobiology of  
505 rodent self-grooming and its value for translational neuroscience. *Nat Rev Neurosci*. **17**, 45-59  
506 (2016).
- 507 29. Ben-Ami Bartal I, Decety J, Mason P. Empathy and pro-social behavior in rats. *Science*. **334**,  
508 1427-1430 (2011).
- 509 30. Ben-Ami Bartal I, Rodgers DA, Bernardez Sarria MS, Decety J, Mason P. Pro-social behavior  
510 in rats is modulated by social experience. *elife*. **3**, e01385 (2014).
- 511 31. Tracy LM, Giummarra MJ. Sex differences in empathy for pain: What is the role of autonomic  
512 regulation? *Psychophysiology*. **54**, 1549-1558 (2017).
- 513 32. Chen Q, Panksepp JB, Lahvis GP. Empathy is moderated by genetic background in mice. *PLoS*  
514 *One*. **4**, e4387 (2009).
- 515 33. Keum S, Park J, Kim A, Park J, Kim KK, Jeong J, Shin HS. Variability in empathic fear  
516 response among 11 inbred strains of mice. *Genes Brain Behav*. **15**, 231-242 (2016).
- 517 34. Fillingim RB. *Sex, gender, and pain* (Seattle: IASP Press, 2000).
- 518 35. de Waal F. *The age of empathy: Nature's lessons for a kinder society* (New York: Crown  
519 Publishing Group, 2009).
- 520 36. Terbeck S, Savulescu J, Chesterman LP, Cowen PJ. Noradrenaline effects on social behaviour,  
521 intergroup relations, and moral decisions. *Neurosci Biobehav Rev*. **66**, 54-60 (2016).
- 522 37. Kilkenny C, Browne WJ, Cuthill IC, Emerson M, Altman DG. Improving bioscience research  
523 reporting: The ARRIVE guidelines for reporting animal research. *J Pharmacol Pharmacother*.  
524 **1**, 94-99 (2010).
- 525 38. Zimmermann M. Ethical guidelines for investigations of experimental pain in conscious  
526 animals. *Pain*. **16**, 109-110 (1983).
- 527 39. Chen J, Guan SM. *Bee venom and Pain* [In: Gopalakrishnakone P. (Editor), *Toxinology:*  
528 *Toxins and Drug Discovery*. Springer, 2017]. pp, 253-294.
- 529 40. Chen J, Guan SM, Sun W, Fu H. Melittin: the major pain-producing substance of bee venom.  
530 *Neurosci Bull*. **32**, 265-272 (2016).
- 531 41. Chen J, Lariviere WR. The nociceptive and anti-nociceptive effects of bee venom injection and  
532 therapy: a double-edged sword. *Prog Neurobiol*. **92**, 151-183 (2010).

- 533 42. Chen J, Luo C, Li HL, Chen HS. Primary hyperalgesia to mechanical and heat stimuli  
534 following subcutaneous bee venom injection into the plantar surface of hindpaw in the  
535 conscious rat: A comparative study with the formalin test. *Pain*. **83**, 67-76 (1999).  
536 43. Meyer RA, Campbell JN, Raja SN. *Peripheral neural mechanisms of nociception* (In: Wall PD,  
537 Melzack R (editors), Textbook of Pain. Churchill Livingstone, 1994), pp. 13-44.  
538 44. Bliss CI. The calculation of the dosage-mortality curve. *Ann Appl Biol*. **22**, 134-167 (1935).  
539

#### 540 **Acknowledgments**

541 **General:** The authors are grateful to Y.-Q. Yu, W. Sun, Y. Wang, Y.-J. Yin, R.-R. Wang, Y.  
542 Yang and F. Yang for cooperation and X.-L. Wang for animal support.  
543

544 **Funding:** This work was supported by grants from the National Natural Science Foundation of  
545 China to J. C (81571072) and to C.-L. L (31600855).  
546

547 **Author contributions:** R.D. and W.J.L designed and performed the mouse and rat experiments,  
548 respectively, participated in data analysis and graph plotting. K.W.G contributed to the setup of  
549 VCR and initial identification of empathic consolation in mice. T.H. performed the partial male  
550 mouse experiments. C.L.L, Y.Y., N.W., and T.H. provided recommendations for experimental  
551 design and participated in some behavioral quantitative analysis. J.C. managed the whole  
552 procedure, integrated the whole data (illustrations and table) and wrote the manuscript. All  
553 authors participated in the discussion of the results and the final revision of the manuscript.  
554

555 **Competing interests:** The authors declare that they have no competing interests.  
556

557 **Data availability:** All data required to review the conclusions of this paper are contained in the  
558 paper and/or supplemental material. Additional data related to this article can be obtained from  
559 the authors.  
560  
561

562 **Figures and Tables**

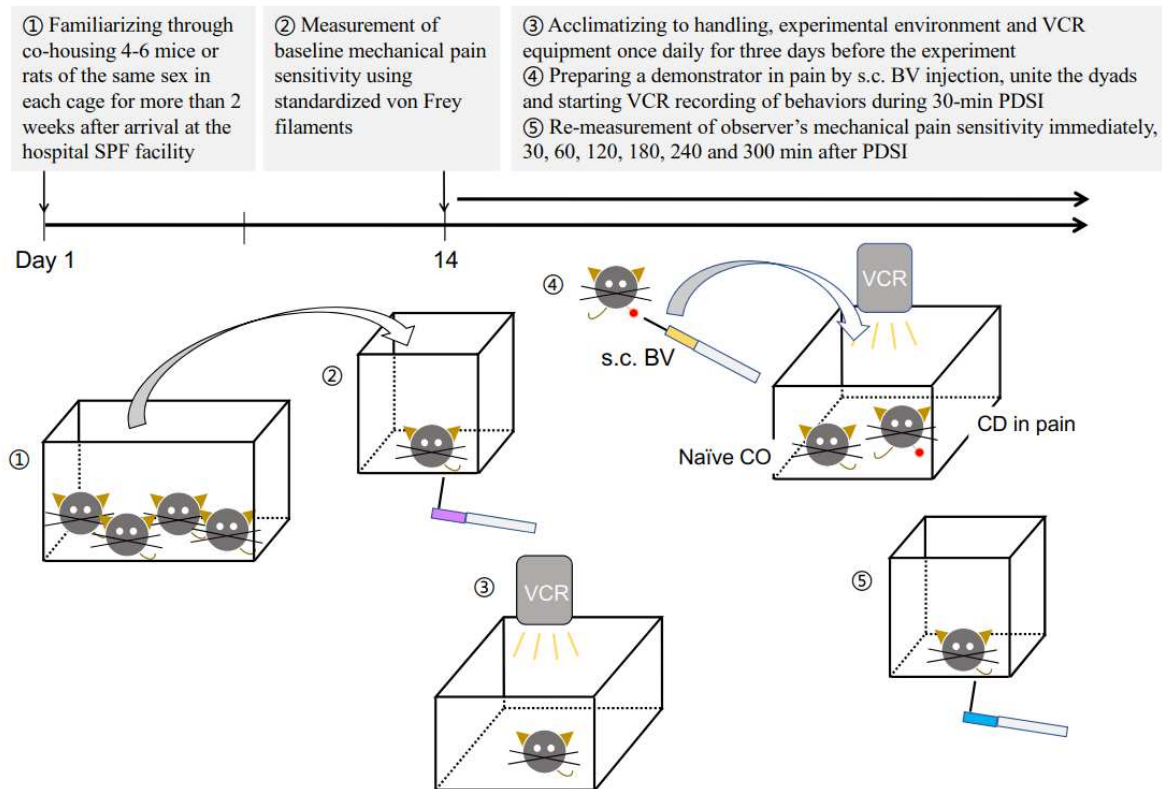

563  
564 **Figure 1** Timeline, experimental design, setup and protocol for the study of empathy for pain in mice  
565 and rats. Abbreviations: BV, bee venom; CD, cagemate demonstrator; CO, cagemate observer; PDSI,  
566 priming dyadic social interaction; s.c., subcutaneous; SPF, specific pathogen free; VCR, video camera  
567 recorder.  
568

569

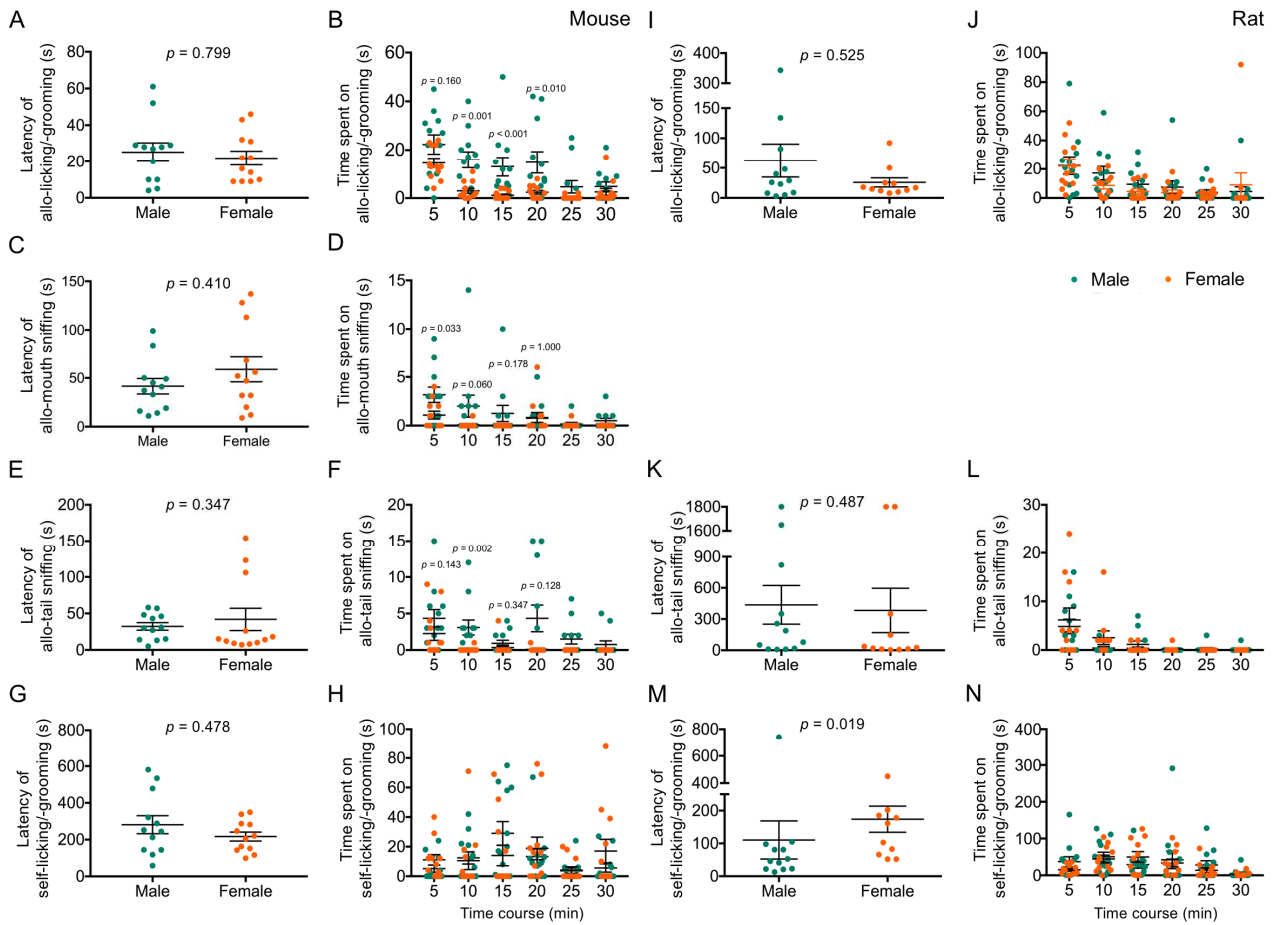

570

571

572

573

574

575

576

577

578

579

580

**Figure 2** Sex and species comparisons of empathic consolation (allo-licking/allo-grooming), general prosocial (allo-mouth and/or allo-tail sniffing) and non-social (self-licking/self-grooming) behaviors between male and female observer mice (A-H) and rats (I-N) during 30-min priming dyadic social interaction with a cagemate demonstrator of the same sex in pain. Latencies and time courses spent by the cagemate observer on allo-licking/allo-grooming (A-B for mice and I-J for rats), allo-mouth sniffing (C-D for mice), allo-tail sniffing (E-F for mice and K-L for rats) and self-licking/self-grooming (G-H for mice and M-N for rats).  $p < 0.05$  as statistical significance [Male (n=12) vs. Female (n=11-12) for each species] with two-tailed two-sample  $t$ -test or Mann-Whitney  $U$  test, for details see **Table S1-S2**. Mean $\pm$ SEM.

581

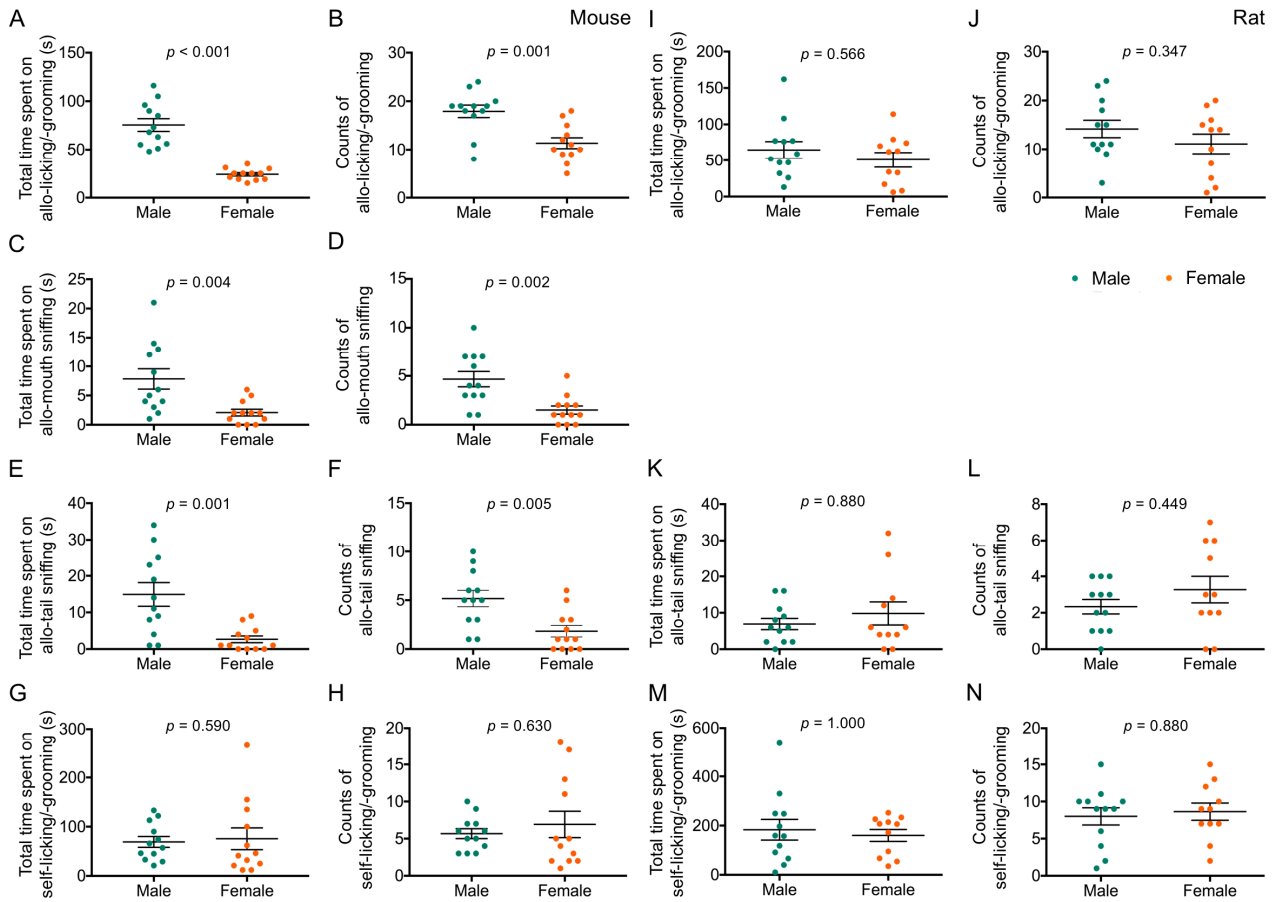

582

583

584

585

586

587

588

589

590

591

**Figure 3** Sex and species comparisons of empathic consolation (allo-licking/allo-grooming), general prosocial (allo-mouth and/or allo-tail sniffing) and non-social (self-licking/self-grooming) behaviors between male and female observer mice (A-H) and rats (I-N) during 30-min priming dyadic social interaction with a cagemate demonstrator of the same sex in pain. Total time and counts spent by the cagemate observer on allo-licking/allo-grooming (A-B for mice and I-J for rats), allo-mouth sniffing (C-D for mice), allo-tail sniffing (E-F for mice and K-L for rats), and self-licking/self-grooming (G-H for mice and M-N for rats).  $p < 0.05$  as statistical significance [Male (n=12) vs. Female (n=11-12) with two-tailed Mann-Whitney  $U$  test, for details see **Table S1**]. Mean $\pm$ SEM.

592

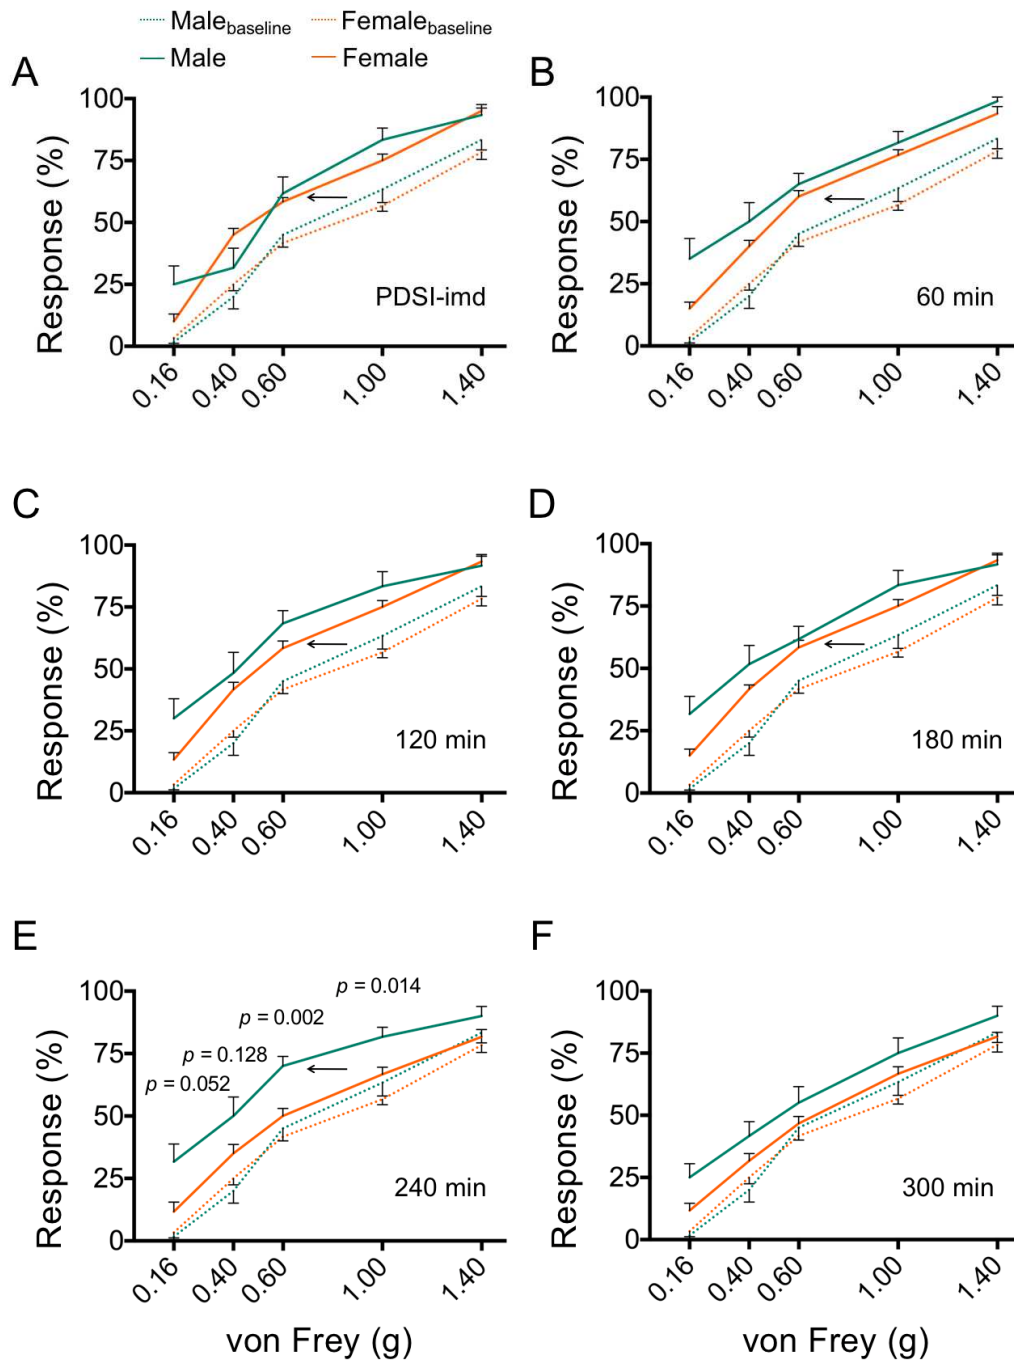

593

594

595

596

597

598

599

**Figure 4** Sex comparisons of the stimulus-response functional curves for mechanical pain sensitivity in mice prior to (Baseline, dashed) and immediately (PDSI-imd, **A**), 60-min (**B**), 120-min (**C**), 180-min (**D**), 240-min (**E**) and 300-min (**F**) after priming dyadic social interaction (PDSI) with a cagemate demonstrator of the same sex in pain.  $p < 0.05$  as statistical significance [Male (n=12) vs. Female (n=12)] with two-tailed Mann-Whitney  $U$  test, for details see **Table S2-S3**. BL, baseline. Mean  $\pm$  SEM.



600

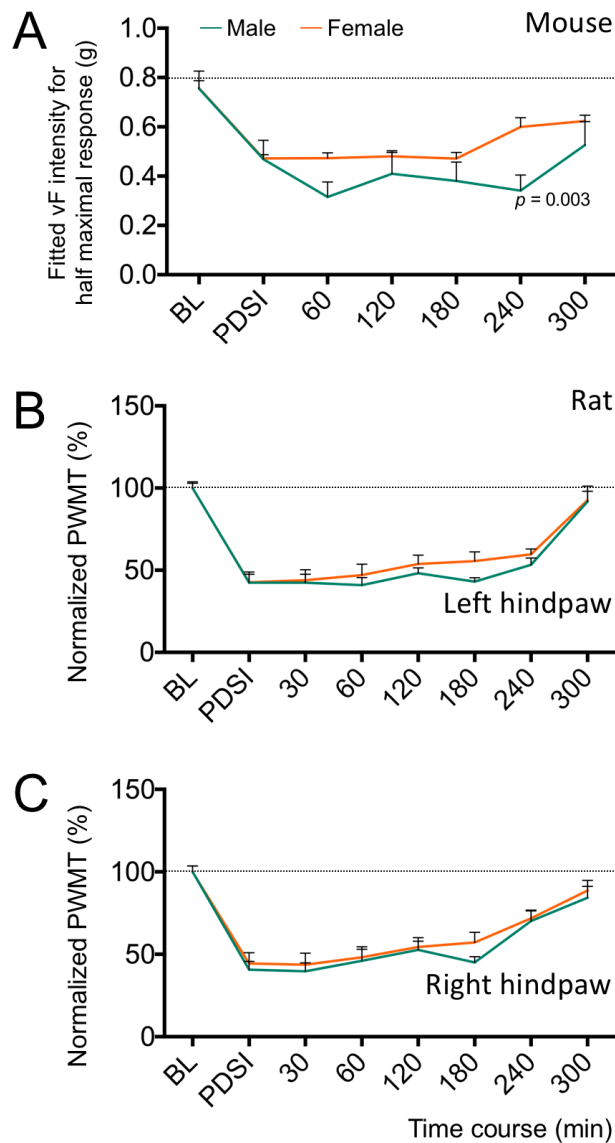

601  
602  
603  
604  
605  
606  
607  
608  
609  
610  
611  
612

**Figure 5** Sex comparisons of changes in mechanical pain sensitivity in mice and rats prior to (BL) and immediately, 30, 60, 120, 180, 240 and 300 min after priming dyadic social interaction (PDSI) with a cagemate demonstrator of the same sex in pain. (A) Time courses of changes in von Frey (vF) intensity (g) for half maximal response fitted from the stimulus-response functional curves of **Figure 4** in mice by Bliss method. (B-C) Time courses of normalized paw withdrawal mechanical threshold (PWMT) measured in the left (B) and right (C) hindpaws of rats. BL, baseline.  $p < 0.05$  as statistical significance [Male (n=8-12) vs. Female (n=12) with two-tailed Mann-Whitney  $U$  test, for details see **Table S2-S3**]. Mean $\pm$ SEM.

613 Table 1 Cross-species comparisons of empathic consolation, general social and non-social behaviors in  
614 subjects of the same sex

|                               | Male           |                 |                  | Female         |                 |                  |
|-------------------------------|----------------|-----------------|------------------|----------------|-----------------|------------------|
|                               | Mouse          | Rat             | <i>P</i> value   | Mouse          | Rat             | <i>P</i> value   |
| <b>Allo-licking/-grooming</b> |                |                 |                  |                |                 |                  |
| Latency (s)                   | 25.25 ± 5.07   | 62.50 ± 27.74   | <i>p</i> = 0.630 | 21.92 ± 3.84   | 25.82 ± 7.48    | <i>p</i> = 0.880 |
| Total time (s)                | 75.50 ± 6.52   | 64.67 ± 11.62   | <i>p</i> = 0.425 | 24.00 ± 1.71   | 50.91 ± 10.25   | <i>p</i> = 0.079 |
| Counts                        | 17.92 ± 1.29   | 14.17 ± 1.79    | <i>p</i> = 0.143 | 11.33 ± 1.12   | 11.09 ± 2.02    | <i>p</i> = 0.928 |
| <b>Allo-tail sniffing</b>     |                |                 |                  |                |                 |                  |
| Latency (s)                   | 32.25 ± 5.23   | 436.67 ± 186.17 | <i>p</i> = 0.101 | 41.83 ± 15.31  | 382.82 ± 213.49 | <i>p</i> = 0.347 |
| Total time (s)                | 14.92 ± 3.23   | 6.92 ± 1.54     | <i>p</i> = 0.089 | 2.67 ± 0.92    | 9.82 ± 3.16     | <i>p</i> = 0.051 |
| Counts                        | 5.17 ± 0.83    | 2.33 ± 0.40     | <i>p</i> = 0.006 | 1.83 ± 0.59    | 3.27 ± 0.73     | <i>p</i> = 0.151 |
| <b>Self-licking/-grooming</b> |                |                 |                  |                |                 |                  |
| Latency (s)                   | 281.17 ± 48.87 | 110.42 ± 58.05  | <i>p</i> = 0.001 | 216.75 ± 24.46 | 173.91 ± 39.87  | <i>p</i> = 0.190 |
| Total time (s)                | 69.08 ± 10.93  | 183.42 ± 42.01  | <i>p</i> = 0.017 | 75.58 ± 22.10  | 160.09 ± 24.36  | <i>p</i> = 0.016 |
| Counts                        | 5.67 ± 0.67    | 8.00 ± 1.16     | <i>p</i> = 0.095 | 6.92 ± 1.78    | 8.64 ± 1.15     | <i>p</i> = 0.260 |
| No. of animals                | n=12           | n=12            |                  | n=12           | n=11            |                  |

615 Notes: All the data were expressed as mean ± SEM. Two tailed two-sample *t* test or Mann-Whitney *U*  
616 test was used depending upon the results of normality and variance tests. *p* < 0.05 was considered as  
617 statistically significant.  
618
